# Supplementary material for: Barriers and Facilitators for Physical Activity in Adults with Type 2 Diabetes Mellitus: A Scoping Review
Source: MDPI journal article supplement (doi:10.3390/ijerph18105359), 2021-05-18
Supplement: s1 [file s1]

**Table S:** Articles analyzed with CASPE

| Study details           | Type of study | Is the trial guided by a clearly defined | Were patients randomly assigned to | Were all patients enrolled adequately | Was the blinding of the patients, | Were the groups similar at the start of | Apart from the intervention under | Does the treatment have a strong | What is the precision of this effect? | Can these results be applied in your | Were all the clinically important results | Do the benefits to be obtained justify | Number of points obtained |
|-------------------------|---------------|------------------------------------------|------------------------------------|---------------------------------------|-----------------------------------|-----------------------------------------|-----------------------------------|----------------------------------|---------------------------------------|--------------------------------------|-------------------------------------------|----------------------------------------|---------------------------|
| Liebreich et al. (2009) | RCT           | 0                                        | 0                                  | 1                                     | 1                                 | 0                                       | 0                                 |                                  |                                       | 0                                    | 0                                         | 0                                      | 1                         |
| Van Dyck et al. (2011)  | RCT           | 0                                        | 0                                  | 0                                     | 0                                 | 0                                       | 0                                 |                                  |                                       | 0                                    | 0                                         | 0                                      | 0                         |
| Collins et al. (2010)   | RCT           | 0                                        | 0                                  | 0                                     | 1                                 | 0                                       | 0                                 |                                  |                                       | 0                                    | 0                                         | 0                                      | 1                         |
| Gallé et al. (2017)     | RCT           | 0                                        | 1                                  | 0                                     | 1                                 | 1                                       | 0                                 |                                  |                                       | 0                                    | 1                                         | 0                                      | 4                         |
| Richardson et al. 2010  | RCT           | 0                                        | 0                                  | 0                                     | 1                                 | 0                                       | 0                                 |                                  |                                       | 0                                    | 0                                         | 0                                      | 1                         |
| Schneider et al. (2016) | RCT           | 0                                        | 0                                  | 0                                     | 0                                 | 0                                       | 0                                 |                                  |                                       | 0                                    | 0                                         | 0                                      | 0                         |
| Alharbi et al. (2016)   | RCT           | 0                                        | 1                                  | 1                                     | 0                                 | 0                                       | 0                                 |                                  |                                       | 0                                    | 0                                         | 0                                      | 2                         |
| Balducci et al. (2015)  | RCT           | 0                                        | 0                                  | 0                                     | 2                                 | 0                                       | 0                                 |                                  |                                       | 0                                    | 0                                         | 0                                      | 2                         |
| Wycherley et al. (2012) | RCT           | 0                                        | 1                                  | 1                                     | 0                                 | 0                                       | 1                                 |                                  |                                       | 0                                    | 0                                         | 0                                      | 3                         |

| Study details         | Type of study | Does the study focus on a clearly defined | Was the cohort recruited in the most | Was the result measured accurately in order to | Did the authors take account of the power and | Was the follow-up of the subjects long enough, | What are the results of this study? | What is the precision of the result? | Do the results appear credible to you? | Do the results of this study coincide with other | Can the results be applied in your environment? | Will this change your clinical decision? | Number of points obtained |
|-----------------------|---------------|-------------------------------------------|--------------------------------------|------------------------------------------------|-----------------------------------------------|------------------------------------------------|-------------------------------------|--------------------------------------|----------------------------------------|--------------------------------------------------|-------------------------------------------------|------------------------------------------|---------------------------|
| Koponen et al. (2018) | Observational | 0                                         | 0                                    | 1                                              | 1                                             | 0                                              |                                     |                                      | 0                                      | 0                                                | 0                                               | 0                                        | 2                         |

|                            |               |   |   |   |   |   |  |  |   |   |   |   |   |
|----------------------------|---------------|---|---|---|---|---|--|--|---|---|---|---|---|
| Centis et al. (2014)       | Observational | 0 | 0 | 0 | 1 | 0 |  |  | 0 | 0 | 0 | 0 | 1 |
| Gómez-Zúñiga et al. (2015) | Observational | 1 | 1 | 1 | 1 | 0 |  |  | 0 | 1 | 0 | 0 | 5 |

| Study details       | Type of study | Did the review focus on a clearly defined subject? | Did the authors look for the right kind of articles? | Do you think the most important and pertinent studies | Do you think the authors of the review have made sufficient | If the results of the different studies were mixed to obtain a combined result, was it reasonable to | What is the overall result of the review? | What is the precision of the result/s? | Can the results be applied in your environment? | Were all the important results considered to make the | Do the benefits outweigh the costs? | Number of points obtained |
|---------------------|---------------|----------------------------------------------------|------------------------------------------------------|-------------------------------------------------------|-------------------------------------------------------------|------------------------------------------------------------------------------------------------------|-------------------------------------------|----------------------------------------|-------------------------------------------------|-------------------------------------------------------|-------------------------------------|---------------------------|
| Soderlund (2018)    | Review        | 1                                                  | 0                                                    | 0                                                     | 1                                                           | 0                                                                                                    |                                           |                                        | 1                                               | 0                                                     | 0                                   | 2                         |
| Patel et al. (2017) | Review        | 0                                                  | 0                                                    | 2                                                     | 0                                                           | 0                                                                                                    |                                           |                                        | 1                                               | 0                                                     | 0                                   | 3                         |

|                                                       |
|-------------------------------------------------------|
| <b>Study details</b>                                  |
| <b>Type of study</b>                                  |
| Were the aims of the study clearly defined?           |
| Is the qualitative methodology appropriate?           |
| Is the research method suitable for meeting the       |
| Was the strategy for selecting participant consistent |
| Were the data collection techniques consistent with   |
| Was there a reflection on the relationship between    |
| Were ethical aspects taken into account?              |
| Was the data analysis sufficiently rigorous?          |
| Is the presentation of the results clear?             |
| Are the research results applicable?                  |
| Number of points obtained                             |

|                         |             |   |   |   |   |   |   |   |   |   |   |   |
|-------------------------|-------------|---|---|---|---|---|---|---|---|---|---|---|
| Laranjo et al. (2015)   | Qualitative | 0 | 0 | 0 | 0 | 0 | 2 | 0 | 1 | 0 | 0 | 3 |
| Miller et al. (2012)    | Qualitative | 0 | 0 | 0 | 0 | 0 | 2 | 0 | 0 | 0 | 1 | 3 |
| Alharbi et al. (2016)   | Qualitative | 0 | 0 | 0 | 2 | 0 | 2 | 0 | 1 | 0 | 0 | 5 |
| Wycherley et al. (2012) | Qualitative | 0 | 0 | 0 | 1 | 0 | 2 | 0 | 1 | 0 | 0 | 4 |
